# Supplementary material for: Spatiotemporal coordination of the RSF1-PLK1-Aurora B cascade establishes mitotic signaling platforms
Source: PubMed Central journal article supplement (PMC8505570; doi:10.1038/s41467-021-26220-z), 2021-10-11
Supplement: 41467_2021_26220_MOESM1_ESM.pdf [file 41467_2021_26220_MOESM1_ESM.pdf]

## **Supplemental Information**

### **Spatiotemporal Coordination of the RSF1-PLK1-Aurora B Cascade Establishes Mitotic Signaling Platforms**

Ho-Soo Lee, Sunwoo Min, Ye-Eun Jung, Sunyoung Chae, June Heo, Jae-Ho Lee, TaeSoo Kim, Ho-Chul Kang, Makoto Nakanish, Sun-Shin Cha, Hyeseong Cho

# Supplementary Figure 1

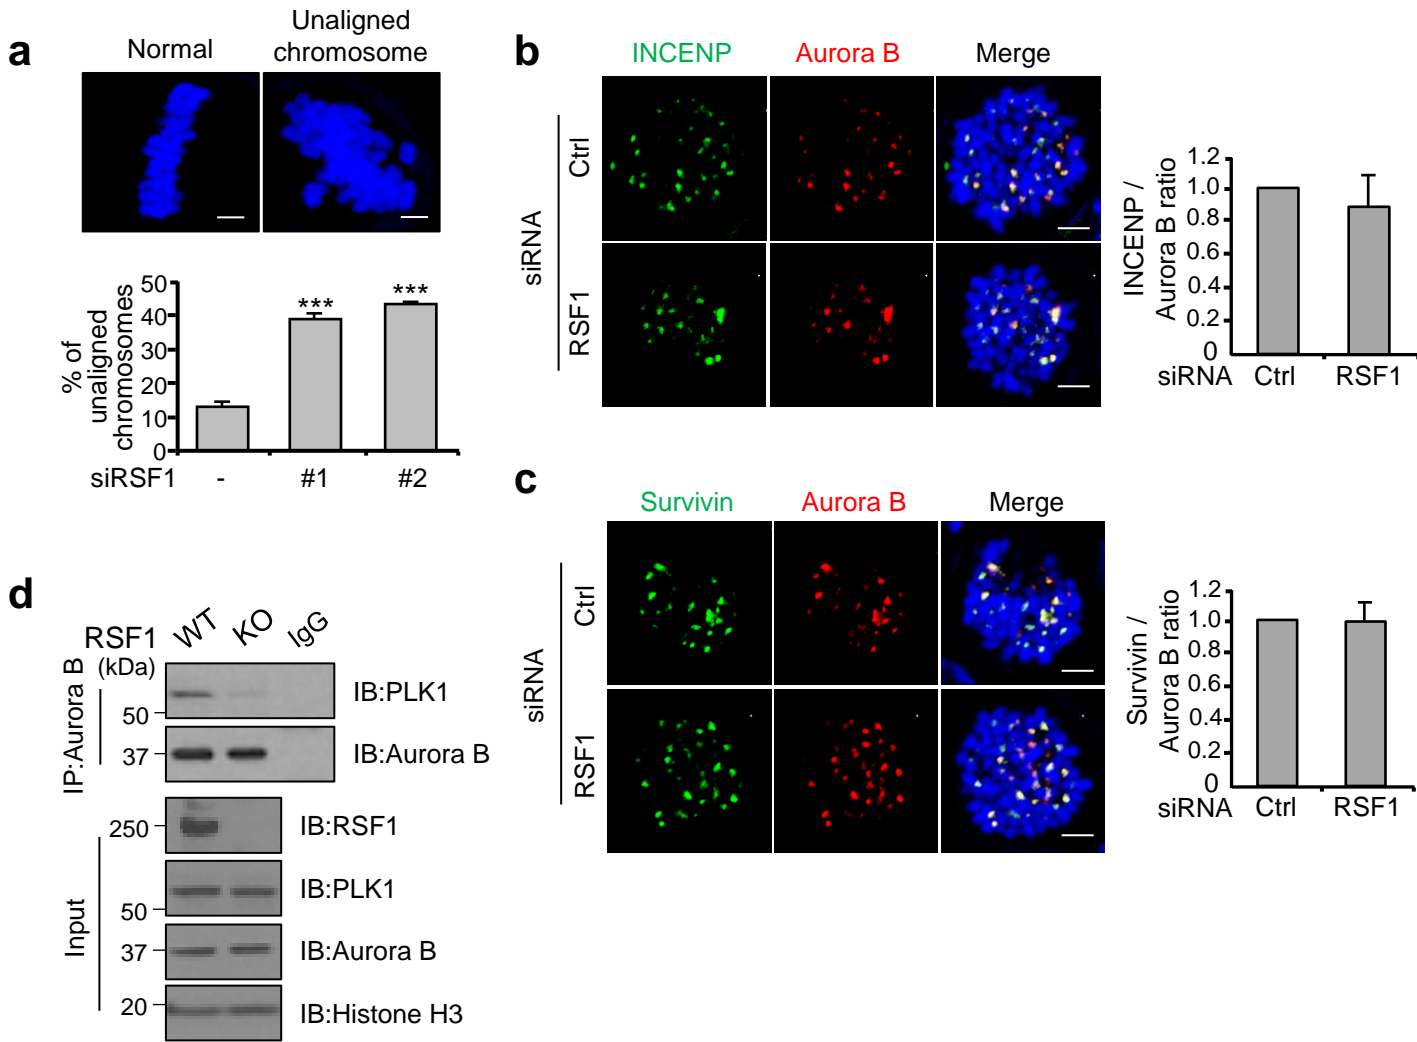

**Supplementary Figure 1** The centromeric localization of CPC components were not altered in RSF1 depleted cells **(a)** After transfection with RSF1 siRNA for 48 h, HeLa cells were treated with 100 ng/ml nocodazole for 12 h and released into the media containing 20  $\mu$ M MG132 for 2 h. These cells arrested at metaphase were fixed with 4% paraformaldehyde and stained with DAPI (blue). Bars represent mean  $\pm$  SEM from three independent experiments;  $n_{\text{siCtrl}} = 232$ ,  $n_{\text{siRSF1\#1}} = 247$ ,  $n_{\text{siRSF1\#2}} = 229$  cells. Statistical significance was tested by two-sided t test; \*\*\* $p < 0.001$ . Scale bar, 5  $\mu$ m. **(b)** Mitotic cells were fixed with 4% paraformaldehyde and stained with INCENP (green) and Aurora B (red) antibodies. Nucleus was stained with DAPI (blue). The graph represents quantification of INCENP signal intensity (right panel). Bars represent mean  $\pm$  SEM from three independent experiments;  $n_{\text{siCtrl}} = 24$ ,  $n_{\text{siRSF1}} = 34$  cells. Scale bar, 5  $\mu$ m. **(c)** Mitotic cells were stained with Survivin (green) and Aurora B (red), DAPI (blue). The quantification of signal intensity of Survivin (bottom panel). Bars represent mean  $\pm$  SEM from three independent experiments;  $n_{\text{siCtrl}} = 21$ ,  $n_{\text{siRSF1}} = 27$  cells. Scale bar, 5  $\mu$ m. **(d)** RSF1 WT or RSF1 KO mitotic cell lysates were immunoprecipitated with anti-Aurora B antibody and immunoblotted with indicated antibodies. Data of d are representative of three independent experiments. Source data are provided as a Source Data file.

# Supplementary Figure 2

**a**

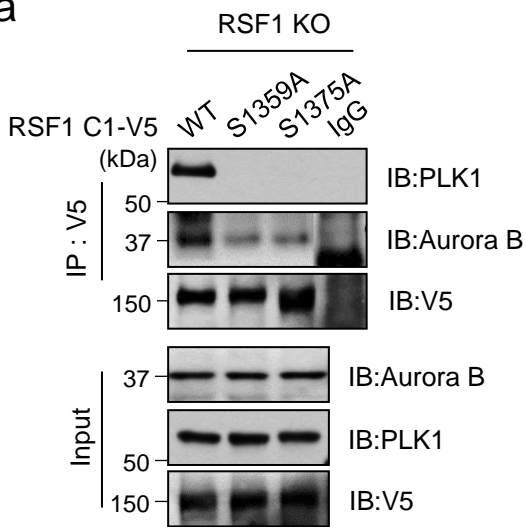

**b**

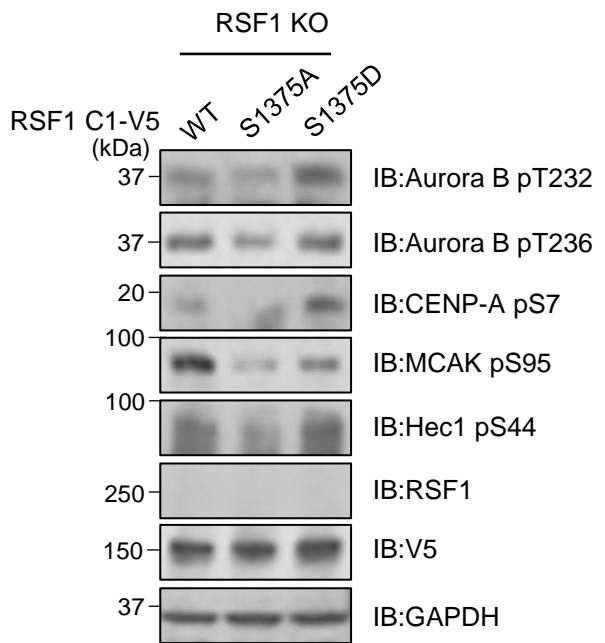

**Supplementary Figure 2** Phosphorylation at S1375 of RSF1 is required for PLK1 binding and Aurora B kinase activity. **(a)** RSF1-C1-V5 plasmid were transfected in RSF1 KO cells and co-immunoprecipitation experiments were carried out with an anti-V5 antibody. **(b)** RSF1 KO cells were introduced with indicated RSF1 constructs and treated with nocodazole for 16h. Mitotic cell lysates were analyzed by immunoblotting. Data of a, b are representative of two independent experiments.

# Supplementary Figure 3

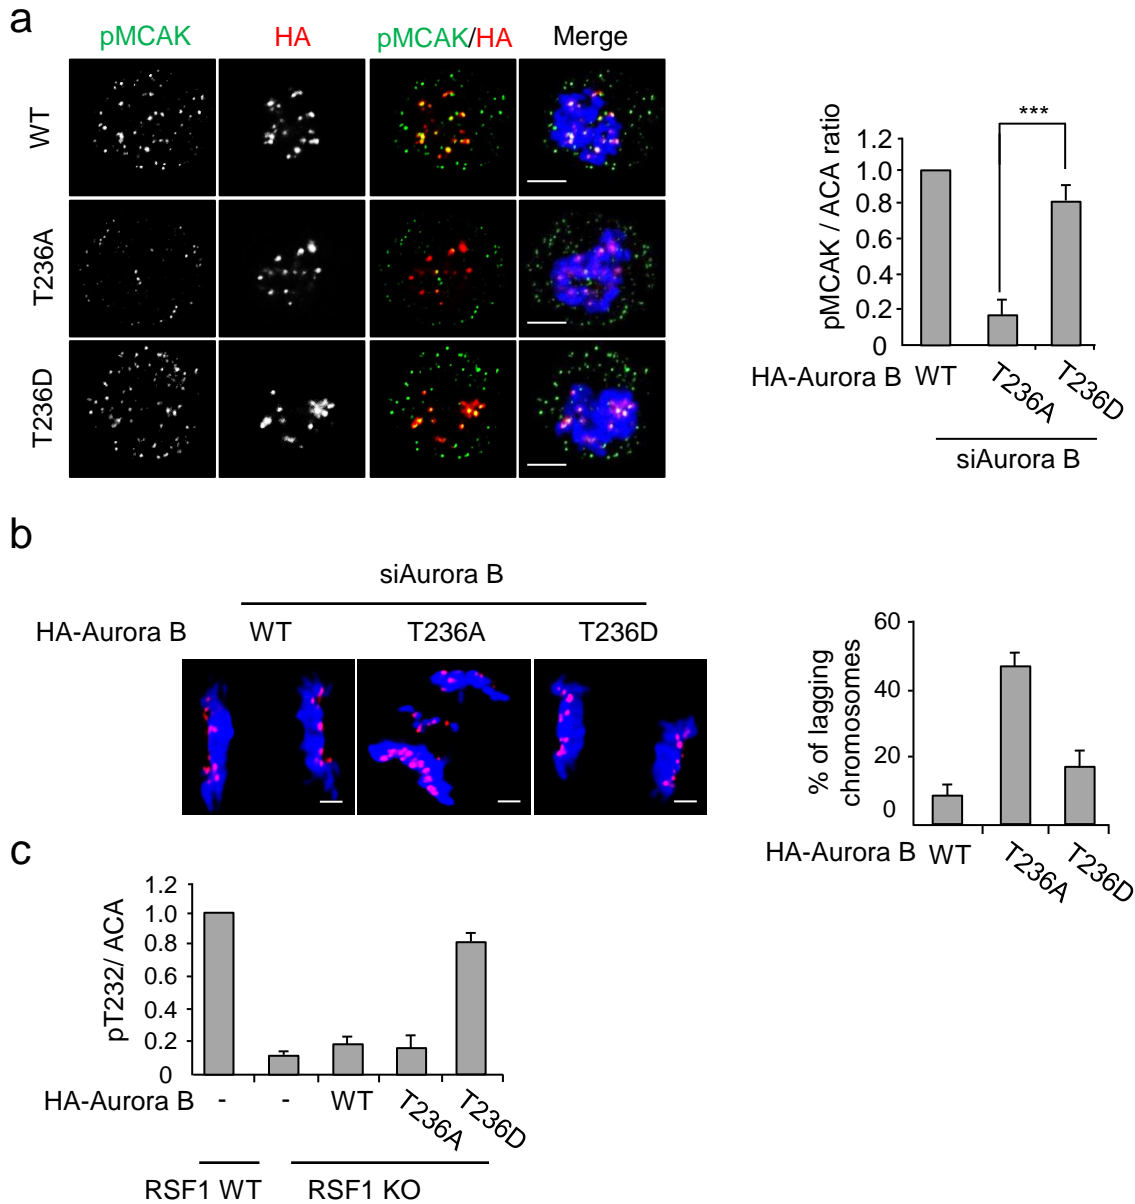

**Supplementary Figure 3** Aurora B T236 phosphorylation is required for Aurora B kinase activity **(a)** Images of HeLa cells transfected with Aurora B T236A or T236D mutants. Mitotic HeLa cells were fixed and stained with anti-MCAK pS95 antibody (green), anti-HA antibody (red), and DAPI (blue). Bar graphs represent the fluorescence ratio of pMCAK against ACA staining (right panel). Data represent mean  $\pm$  SEM from three independent experiments;  $n_{WT} = 23$ ,  $n_{T236A} = 27$ ,  $n_{T236D} = 31$  cells. Statistical significance was tested by two-sided t test;  $***p < 0.001$ . Scale bar, 5  $\mu$ m. **(b)** HeLa cells were co-transfected with HA-Aurora B WT or T236A/D mutant in Aurora B depleted cells. Floating mitotic cells were fixed and stained with ACA antibody (red), and DAPI (blue). The quantification of lagging chromosomes (%) from the acquired images (right panel). Bars represent mean  $\pm$  SEM from three independent experiments;  $n_{WT} = 239$ ,  $n_{T236A} = 250$ ,  $n_{T236D} = 242$  mitotic cells. Scale bar, 5  $\mu$ m. **(c)** Bar graphs represent the fluorescence ratio of Aurora B pT232 against HA staining in Fig 4f. Bars represent mean  $\pm$  SEM from three independent experiments;  $n_{WT} = 28$ ,  $n_{RSF1\ KO} = 34$ ,  $n_{KO+Aurora\ B\ WT} = 46$ ,  $n_{KO+T236A} = 39$ ,  $n_{KO+T236D} = 43$  cells. Source data are provided as a Source Data file.

# Supplementary Figure 4

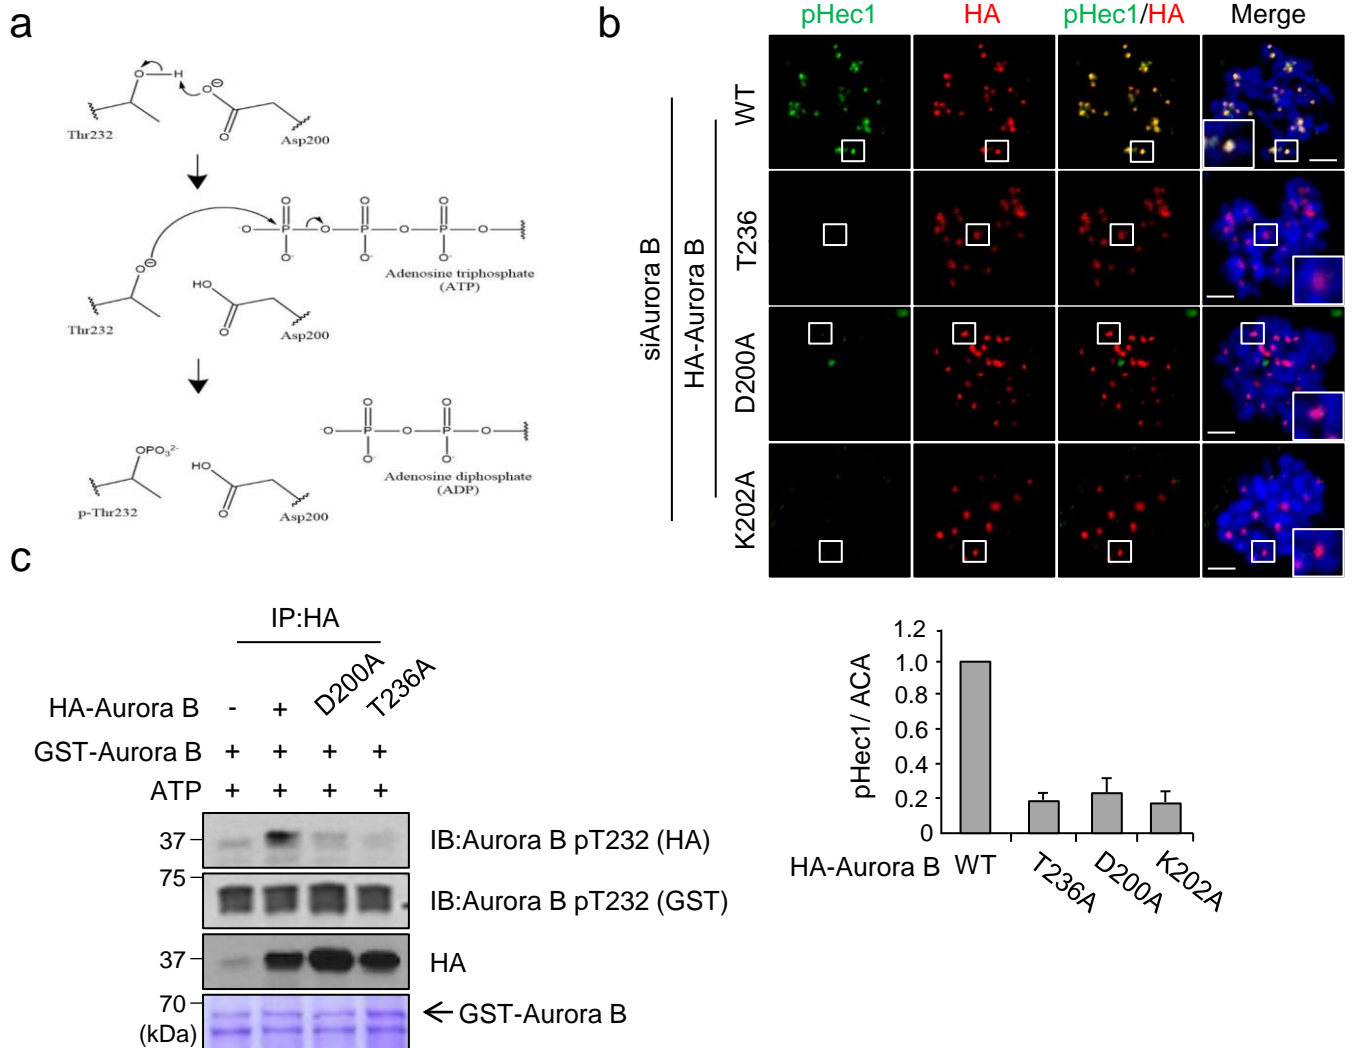

**Supplementary Figure 4** The schematic diagram of the general base catalyzed auto-phosphorylation mechanism. **(a)** pThr232 indicates the phosphorylated Thr232. **(b)** HeLa cells transfected with Aurora B D200A or K202A mutants in Aurora B depleted cells. Floating mitotic cell were fixed and stained with anti-Hec1 pS55 antibody (green), anti-HA antibody (red), and DAPI (blue). Bar graphs represent the fluorescence ratio of pHec1 against HA staining (bottom panel). Bars represent mean  $\pm$  SEM from three independent experiments;  $n_{WT} = 21$ ,  $n_{T236A} = 29$ ,  $n_{D200A} = 32$ ,  $n_{K202A} = 33$  cells. Scale bar, 5  $\mu$ m. **(c)** The kinase assay with immunoprecipitants of cells expressing Aurora B inactive mutant (D200A, T236A) tagged with HA in the presence of WT Aurora B tagged with GST. Data of c are representative of three independent experiments. Source data are provided as a Source Data file.

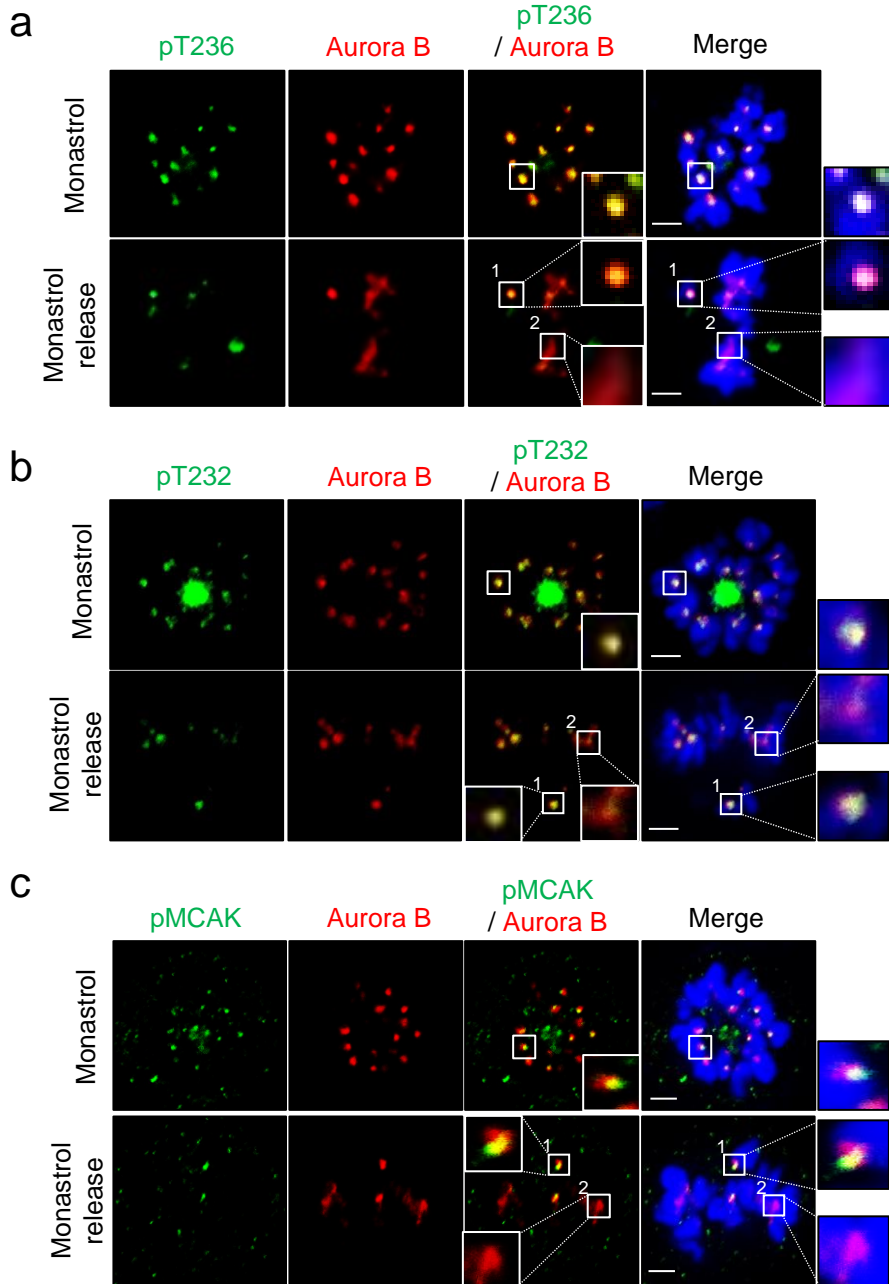

**Supplementary Figure 5** Phosphorylation at Thr236 of Aurora B was detected in mis-aligned chromosomes **(a)** HeLa cells treated with monastrol for 4 h and synchronously released to the metaphase for 30 min in the presence of MG132. Floating mitotic cells were stained with anti-Aurora B-pThr236 (green) and Aurora B (red) antibodies and DAPI was used to stain nuclei (blue). Insets show Aurora B-pThr236 staining on mis-aligned (1) vs. aligned (2) kinetochores. Scale bar, 5  $\mu$ m. **(b)** Floating mitotic cells were stained with anti-Aurora B-pThr232 (green) and Aurora B (red) antibodies. Insets show higher magnification views of the boxed areas. Scale bar, 5  $\mu$ m. **(c)** Immunofluorescence images acquired using the MCAK pS95 antibodies against Aurora B in monastrol treated HeLa cells. Insets show enlarged mis-aligned or aligned chromosomes from boxed region. Scale bar, 5  $\mu$ m.

# Supplementary Figure 6

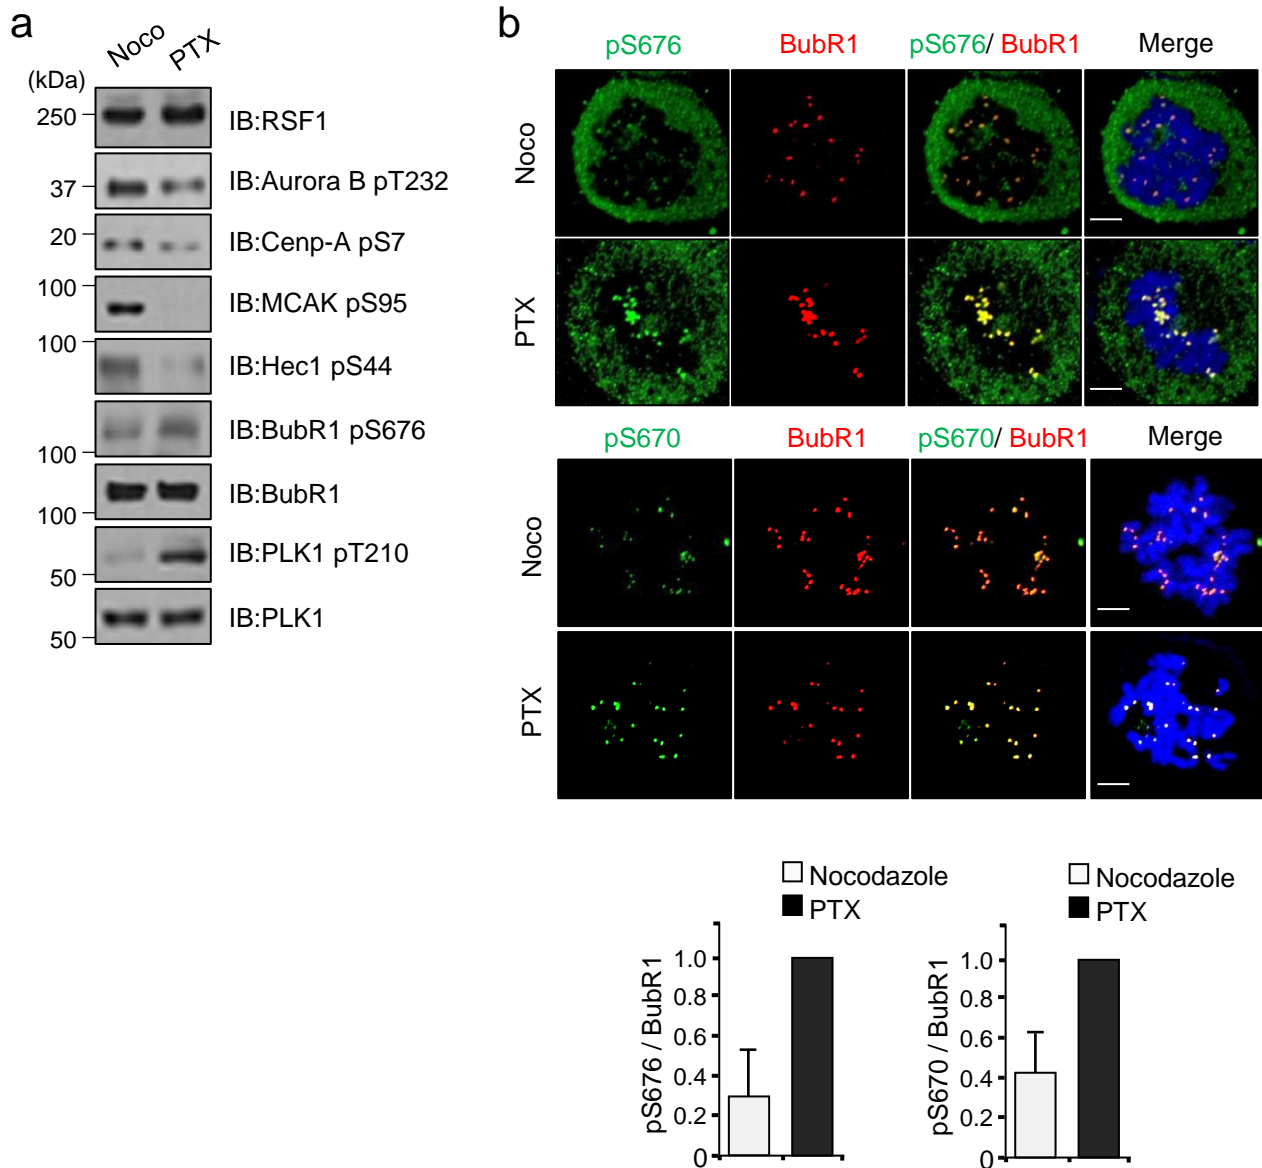

**Supplementary Figure 6** Phosphorylation on Ser676 of BubR1 was significantly elevated in paclitaxel-arrested cells **(a)** HeLa cells were treated with nocodazole or paclitaxel for 16 h. Mitotic cells were subjected to Western blot analysis with the indicated antibodies. **(b)** HeLa cells were obtained after nocodazole or paclitaxel treatment for 4 h and subjected to immunostaining. The prometaphase cells were stained with indicated phospho-specific antibodies against BubR1 (green) and total BubR1 (red) were applied for the comparison. Bar graphs represent the fluorescence ratio of BubR1-pT676 ( $n_{\text{Noco}} = 23$ ,  $n_{\text{PTX}} = 25$ ) or BubR1-pT670 ( $n_{\text{Noco}} = 22$ ,  $n_{\text{PTX}} = 28$ ) against BubR1 staining (bottom panel). Bars represent mean  $\pm$  SEM from three independent experiments. Scale bar, 5  $\mu\text{m}$ . Data of a are representative of three independent experiments. Source data are provided as a Source Data file.

# Supplementary Figure 7-1

a

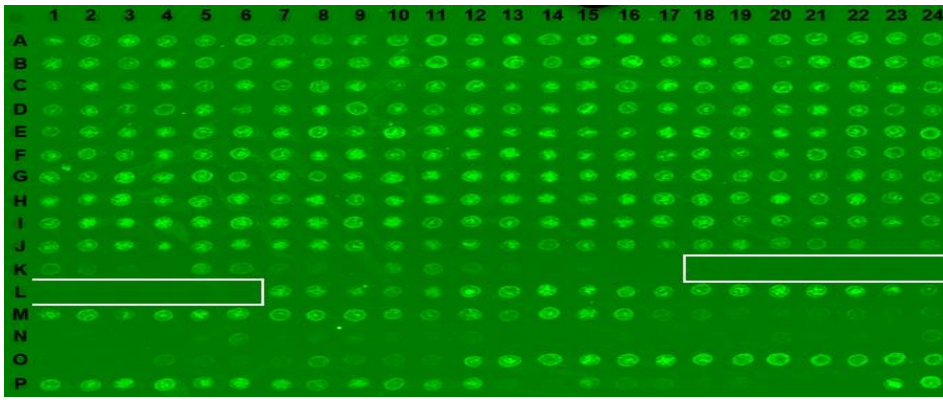

b

| Modification number | Peptide location | Peptide sequence                                               | name                    | Mod1    | Mod2   | Mod 3 | Mod 4 | N-terminus   |
|---------------------|------------------|----------------------------------------------------------------|-------------------------|---------|--------|-------|-------|--------------|
| 1                   | A 1              | ARTKQTARKSTGGKAPRKQ                                            | H3 1-19                 | unmod   |        |       |       | free         |
| 220                 | J 4              | ARKSTGGKAPRKQLATKAAR                                           | H3 7-26                 | unmod   |        |       |       | acetylated   |
| 236                 | J20              | PRKQLATKAARKSAPATGG                                            | H3 16-35                | unmod   |        |       |       | acetylated   |
| 244                 | K 4              | PRKQLATKAARKpSAPATGG                                           | H3 16-35                | S28P    |        |       |       | acetylated   |
| 249                 | K 9              | PRKQLATKAA Rme2s KpSAPATGG                                     | H3 16-35                | R26me2s | S28P   |       |       | acetylated   |
| 254                 | K14              | PRKQLATKAA Rme2a KpSAPATGG                                     | H3 16-35                | R26me2a | S28P   |       |       | acetylated   |
| 258                 | K18              | PRKQLATKAA Cit KpSAPATGG                                       | H3 16-35                | R26Cit  | S28P   |       |       | acetylated   |
| 259                 | K19              | PRKQLATKAAR Kme1 pSAPATGG                                      | H3 16-35                | K27me1  | S28P   |       |       | acetylated   |
| 260                 | K20              | PRKQLATKAAR Kme2 pSAPATGG                                      | H3 16-35                | K27me2  | S28P   |       |       | acetylated   |
| 261                 | K21              | PRKQLATKAAR Kme3 pSAPATGG                                      | H3 16-35                | K27me3  | S28P   |       |       | acetylated   |
| 262                 | K22              | PRKQLATKAAR Kac pSAPATGG                                       | H3 16-35                | K27ac   | S28P   |       |       | acetylated   |
| 263                 | K23              | PRKQLATKAA Rme2s Kme1 pSAPATGG                                 | H3 16-35                | R26me2s | K27me1 | S28P  |       | acetylated   |
| 264                 | K24              | PRKQLATKAA Rme2s Kme2 pSAPATGG                                 | H3 16-35                | R26me2s | K27me2 | S28P  |       | acetylated   |
| 265                 | L 1              | PRKQLATKAA Rme2s Kme3 pSAPATGG                                 | H3 16-35                | R26me2s | K27me3 | S28P  |       | acetylated   |
| 266                 | L 2              | PRKQLATKAA Rme2s Kac pSAPATGG                                  | H3 16-35                | R26me2s | K27ac  | S28P  |       | acetylated   |
| 267                 | L 3              | PRKQLATKAA Rme2a Kme1 pSAPATGG                                 | H3 16-35                | R26me2a | K27me1 | S28P  |       | acetylated   |
| 268                 | L 4              | PRKQLATKAA Rme2a Kme2 pSAPATGG                                 | H3 16-35                | R26me2a | K27me2 | S28P  |       | acetylated   |
| 269                 | L 5              | PRKQLATKAA Rme2a Kme3 pSAPATGG                                 | H3 16-35                | R26me2a | K27me3 | S28P  |       | acetylated   |
| 270                 | L 6              | PRKQLATKAA Rme2a Kac pSAPATGG                                  | H3 16-35                | R26me2a | K27ac  | S28P  |       | acetylated   |
| 380                 | P20              | Bio AANW SHPQFEKAA                                             | Biotin, control peptide |         |        |       |       | biotinylated |
| 381                 | P21              | EQLI SEEDLA                                                    | c-myc tag               |         |        |       |       | free         |
| 382                 | P22              | HAc                                                            | neg. control            |         |        |       |       | acetylated   |
| 383                 | P23              | K Kme1 Kme2 Kme3 Kac R Rme2s R Rme2a R Cit K Kme1 Kac Kme3 R K | background 0 1          |         |        |       |       | acetylated   |
| 384                 | P24              | R Rme2s K Kme1 Kac R Rme2a Kme2 K Kme3 R Kme1 Rme2s K Kac R K  | background 0 2          |         |        |       |       | acetylated   |

c

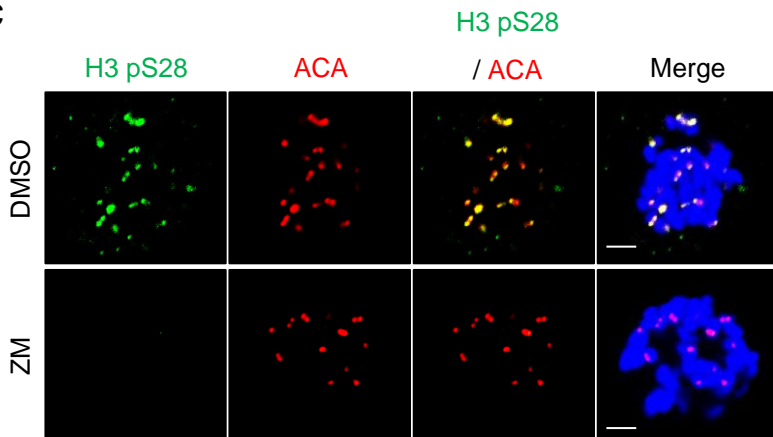



## Supplementary Figure 7-2

**Supplementary Figure 7** Analysis of the binding specificity of the RSF1 on histone peptide array **(a)** Celluspot peptide arrays spotted on glass slides were provided from Active Motif (Cat. No. 13001). The peptide sequence and PTMs are specified in the additional file 1. Histone peptides containing unique 384 different modification combinations are spotted in the glass slide. Positive interactions of RSF1 protein are visualized as green fluorescence. **(b)** MODified™ Histone Peptide Array and reference grid for histone peptide locations. **(c)** HeLa cells were treated with nocodazole for 4 h and ZM447439 for 30 min in the presence of MG132. The prometaphase cells were stained with anti-Histone H3 pS28 (green) and anti-Aurora B (red) antibodies. Scale bar, 5  $\mu\text{m}$ . Data of c are representative of three independent experiments.

# Supplementary Figure 8

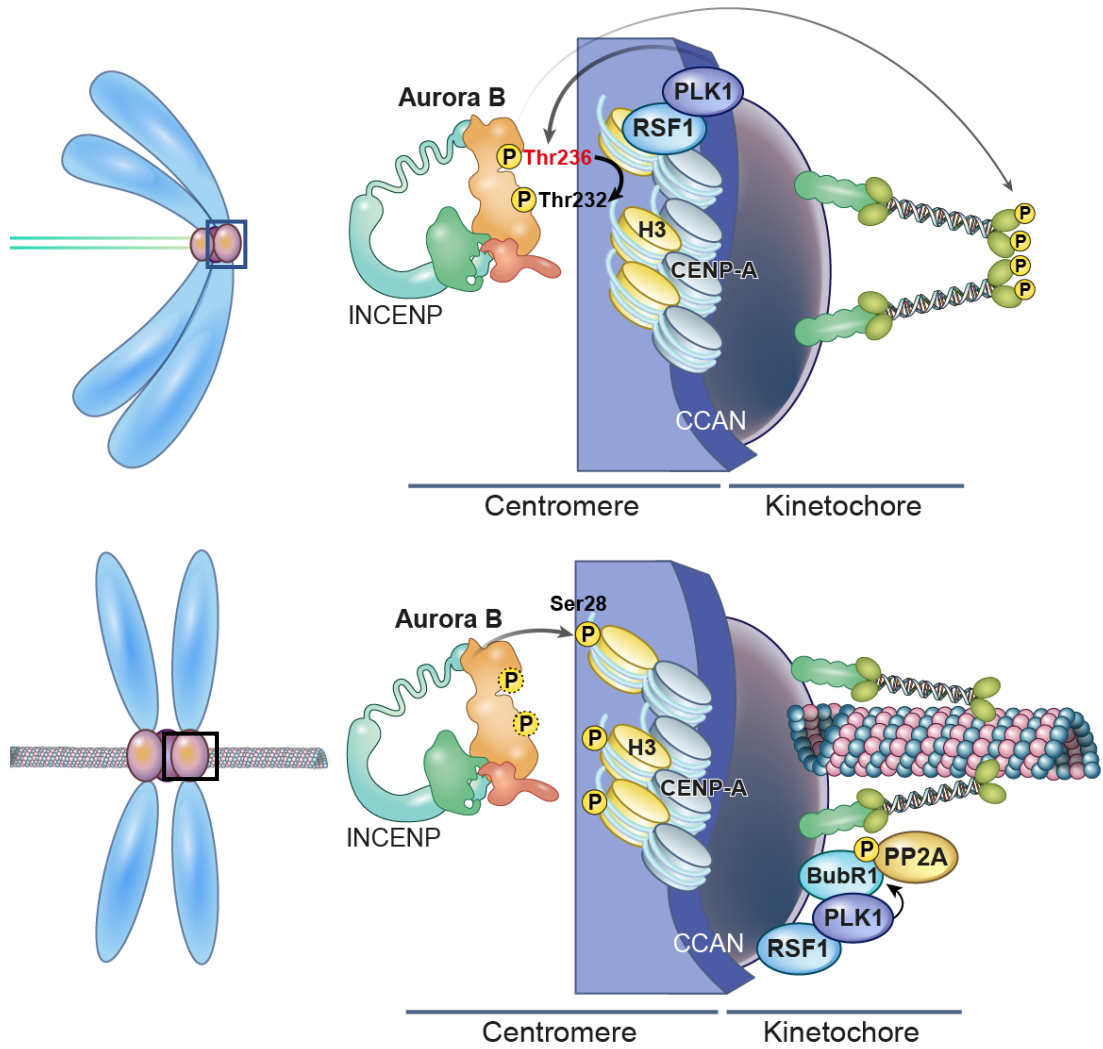

**Supplementary Figure 8** A proposed model for the on/off switch on Aurora B by spatiotemporal regulation of the RSF1-PLK1 axis.

# Supplementary Table 1

| Primers                                                            | Sequence (5'-3')                                   |
|--------------------------------------------------------------------|----------------------------------------------------|
| Mutagenesis forward primer of Aurora B T236A                       | 5'-AAGACAATGTGTGGCGCCCTGGACTACCTGC-3'              |
| Mutagenesis reverse primer of Aurora B T236A                       | 5'- GCAGGTAGTCCAGGGCGCCACACATTGTCTT-3'             |
| Mutagenesis forward primer of Aurora B T236D                       | 5'-GAAGACAATGTGTGGCGACCTGGACTACCTGCC-3'            |
| Mutagenesis reverse primer of Aurora B T236D                       | 5'- GGCAGGTAGTCCAGGTCGCCACACATTGTCTTC-3'           |
| Mutagenesis forward primer of Aurora B D200A                       | 5' GAAGAAGGTGATTCACAGAGCCATAAAGCCAGAAAATCTGC<br>3' |
| Mutagenesis reverse primer of Aurora B D200A                       | 5' GCAGATTTTCTGGCTTTATGGCTCTGTGAATCACCTTCTTC 3'    |
| Mutagenesis forward primer of Aurora B K202A                       | 5' GGTGATTCACAGAGACATAGCGCCAGAAAATCTGCTCTTAG<br>3' |
| Mutagenesis reverse primer of Aurora B K202A                       | 5' CTAAGAGCAGATTTTCTGGCGCTATGTCTCTGTGAATCACC 3'    |
| Mutagenesis forward primer of Histone H3 S28A                      | 5' GCGGCTCGGAAGGCCGCTCCGGCCAC 3'                   |
| Mutagenesis reverse primer of Histone H3 S28A                      | 5' GTGGCCGGAGCGGCCTTCCGAGCCGC 3'                   |
| Mutagenesis forward primer of Histone H3 S28D                      | 5' GGCGGCTCGGCCGGACGCTCCGGCCACC 3'                 |
| Mutagenesis reverse primer of Histone H3 S28D                      | 5' GGTGGCCGGAGCGTCCTTCCGAGCCGCC 3'                 |
| siRNA oligonucleotide sequence of human Aurora B (targeting 3'UTR) | 5'-CGUGUGUUUGUAUGUCUGU-3'                          |
| siRNA oligonucleotide sequence of human RSF1 #1                    | 5'-UCGAAACGAGUUGGCUGAGACUCUU-3'                    |
| siRNA oligonucleotide sequence of human RSF1 #2                    | 5'-GGAAAAUGUCAAAACCAUU-3'                          |
| siRNA oligonucleotide sequence of human SNF2H                      | 5'-AUAGCUCUUCAUCCUCCUCUU-3'                        |

**Supplementary Table 1** Primers used in this study.

# Supplementary Table 2

| Antibodies                                       | WB<br>(Dilution) | ICC<br>(Dilution) | Company                  | Catalog No. |
|--------------------------------------------------|------------------|-------------------|--------------------------|-------------|
| Human anti-ACA                                   |                  | 1:2000            | Immunovision             | HCT-0100    |
| Mouse monoclonal anti-AIM1                       | 1:1000           | 1:500             | BD science               | 611083      |
| Rabbit polyclonal anti-Aurora B                  |                  | 1:500             | Abcam                    | Ab2254      |
| Rabbit polyclonal anti-Aurora B pT232            | 1:1000           | 1:500             | Cell Signaling           | 2914        |
| Rabbit polyclonal anti-Aurora B pT236            | 1:1000           | 1:500             | Abnova                   | PAB2635     |
| Mouse monoclonal anti-BubR1                      | 1:1000           | 1:500             | BD science               | 612505      |
| Rabbit polyclonal anti-BubR1                     |                  | 1:500             | Cell Signaling           | 2186        |
| Rabbit polyclonal anti-BubR1 pS670               | 1:1000           | 1:500             | N/A                      |             |
| Rabbit polyclonal anti-BubR1 pS676               | 1:1000           | 1:500             | N/A                      |             |
| Mouse monoclonal anti-CENP-A                     | 1:1000           | 1:500             | Abcam                    | ab13939     |
| Rabbit polyclonal anti-CENP-A                    |                  | 1:500             | Cell Signaling           | 2186        |
| Rabbit polyclonal anti-CENP-A pS7                | 1:1000           | 1:500             | Cell Signaling           | 2187        |
| Rabbit polyclonal anti-GAPDH                     | 1:1000           |                   | Cell Signaling           | 2118        |
| Mouse monoclonal anti-GST                        | 1:1000           |                   | Santa Cruz               | B-14        |
| Mouse monoclonal anti-HA                         | 1:1000           | 1:500             | Santa Cruz               | sc-7392     |
| Mouse monoclonal anti-Hec1                       | 1:1000           | 1:500             | abcam                    | ab3613      |
| Rabbit polyclonal anti-Hec1 pS55                 | 1:1000           | 1:500             | GeneTex                  | GTX70017    |
| Mouse monoclonal anti-His                        | 1:1000           |                   | Santa Cruz               | H-3         |
| Rabbit polyclonal anti-INCENP                    | 1:1000           | 1:500             | Abcam                    | ab36453     |
| Mouse monoclonal anti-M2 Flag                    | 1:1000           | 1:1000            | Sigma                    | F3165       |
| anti-MCAK                                        | 1:1000           | 1:500             | N/A                      |             |
| Rabbit polyclonal anti-MCAK pS95                 | 1:1000           | 1:500             | abcam                    | ab74146     |
| Mouse monoclonal anti-Myc                        | 1:1000           |                   | Santa Cruz               | sc-40       |
| Mouse monoclonal anti-PLK1                       | 1:1000           | 1:500             | Abcam                    | ab17057     |
| Rabbit polyclonal anti-PLK1                      |                  | 1:500             | Santa Cruz               | H-152       |
| Mouse monoclonal anti-PLK1 pT210                 | 1:1000           | 1:500             | Abcam                    | ab39068     |
| Mouse monoclonal anti-PP2A Catalytic $\alpha$    | 1:1000           |                   | BD science               | 610555      |
| Mouse monoclonal anti-RSF1                       |                  | 1:500             | Upstate                  | 05-727      |
| Rabbit monoclonal anti-RSF1                      | 1:1000           | 1:500             | Abcam                    | ab109002    |
| Rabbit polyclonal anti-Topoisomerase II $\alpha$ | 1:1000           |                   | Santa Cruz               | sc-13058    |
| Rabbit monoclonal anti-Histone H3 pS28           | 1:1000           | 1:500             | Millipore                | MABE76      |
| Rabbit polyclonal anti-Histone H3 pS28           |                  | 1:500             | Abcam                    | Ab5196      |
| Rabbit polyclonal anti-Histone H3                | 1:1000           | 1:500             | Santa Cruz               | Sc-10809    |
| Mouse monoclonal anti-GFP                        | 1:1000           |                   | Santa Cruz               | Sc-9996     |
| Mouse monoclonal anti-V5                         | 1:1000           | 1:500             | Invitrogen               | R960-25     |
| Alexa Fluor 488 goat anti-mouse IgG H&L          |                  | 1:500             | Thermo Fisher Scientific | A-11029     |
| Alexa Fluor 488 goat anti-rabbit IgG H&L         |                  | 1:500             | Thermo Fisher Scientific | A-11034     |
| Alexa Fluor 594 goat anti-mouse IgG H&L          |                  | 1:500             | Thermo Fisher Scientific | A-11032     |
| Alexa Fluor 594 goat anti-rabbit IgG H&L         |                  | 1:500             | Thermo Fisher Scientific | A-11037     |
| Texas Red goat anti-Human IgG H&L                |                  |                   | Thermo Fisher Scientific | PA1-28834   |

**Supplementary Table 2** List of antibodies used in this study.
